# Supplementary material
Source: publisher figshare collection journal article supplement (https://karger.figshare.com/ndownloader/files/24757487)
Supplement: Supplementary file 1 [file 24757487]

**Supplemental Figure 1: Relative risk of SCC tumours when comparing modified-EDIP deciles**


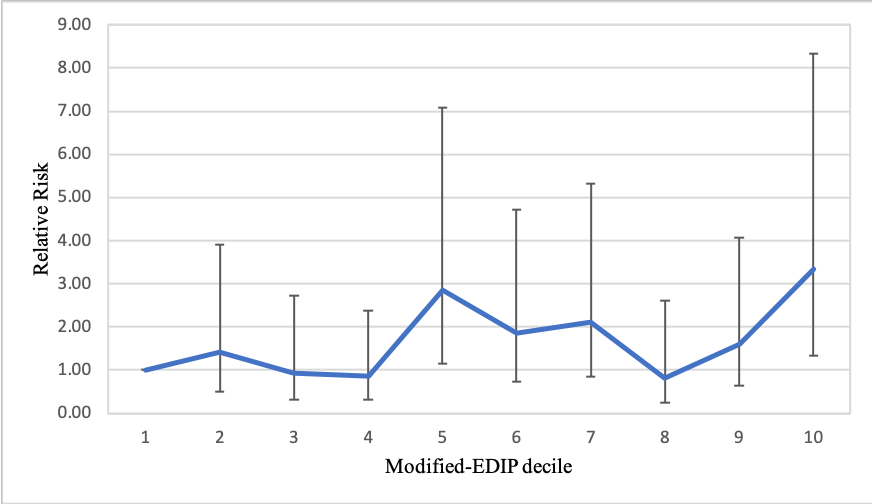


Reference group decile 1, all relative risks adjusted for age, sex, education, and skin cancer excision history. Error bars represent 95% confidence intervals, dashed lines represent cut-points in creating the low, intermediate and high groups.

Supplemental Figure 2: Relative risk of BCC when comparing modified-EDIP deciles.


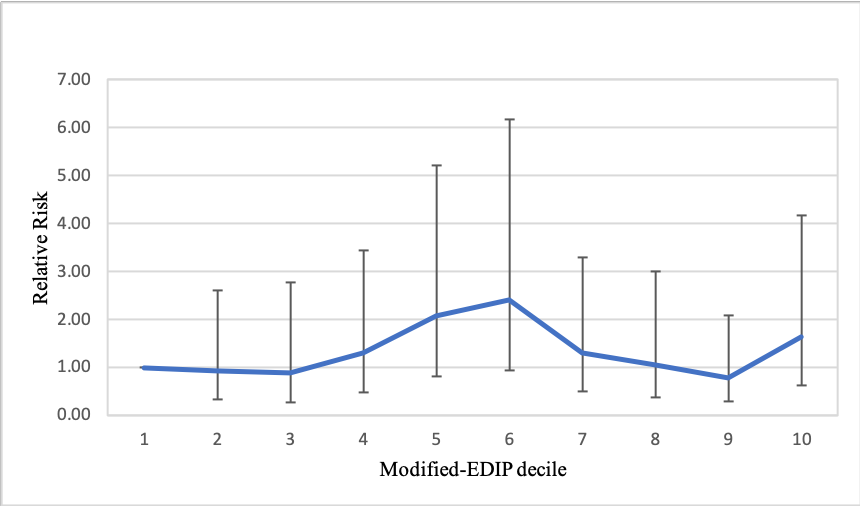


Reference group decile 1, all relative risks adjusted for age, sex, education, skin cancer excision history. Error bars represent 95% confidence intervals, dashed lines represent cut-points in creating the low, intermediate and high groups
